# Supplementary material for: The Eocene–Oligocene transition: a review of marine and terrestrial proxy data, models and model–data comparisons
Source: Copernicus journal article supplement (doi:10.5194/cp-17-269-2021), 2021-01-28
Supplement: Supplementary file 1 [file cp-17-269-2021-supplement.zip]

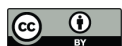

## *Supplement of*

# **The Eocene–Oligocene transition: a review of marine and terrestrial proxy data, models and model–data comparisons**

**David K. Hutchinson et al.**

*Correspondence to:* David K. Hutchinson ([david.hutchinson@geo.su.se](mailto:david.hutchinson@geo.su.se))

- [cp-17-269-2021-supplement-title-page.pdf](#)
- [Supplementary\\_Figures.pdf](#)
- [Table\\_S1\\_Marine\\_Temperatures.xlsx](#)
- [Table\\_S2\\_Terrestrial\\_temperatures.xlsx](#)
- [Table\\_S3\\_Combined\\_Delta\\_T.xlsx](#)

The copyright of individual parts of the supplement might differ from the CC BY 4.0 License.
