# Supplementary material for: The Eocene–Oligocene transition: a review of marine and terrestrial proxy data, models and model–data comparisons
Source: Copernicus journal article supplement (doi:10.5194/cp-17-269-2021), 2021-01-28
Supplement: Supplementary file 1 [file Table_S1_Marine_Temperatures.xlsx]

## Sheet: Sheet1
Site	Lat	Lon	lat 34 Ma	lon 34 Ma	Temp Eoc (38-33.9 Ma)	Eoc error	Temp Olig (33.9-30Ma)	Olig error	Delta T	Delta T error	Proxy	Reference	Reference link
Gulf Coast	32.3725	-90.8699	28.918	-76.525	22.25	2.75772	21.6333	1.45717	-0.616667	2.75772	d18O	Kobashi et al (2004)	﻿http://dx.doi.org/10.1029/2003PA000934
689	-64.52	3.1	-67.905	13.54	13.325	4.0436	11.9	0.689202	-1.425	4.0436	D47	Petersen & Schrag (2015)	﻿https://doi.org/10.1002/2014PA002769
SSQ	31.55	-88.03	27.726	-73.969	29.5	0.603324	28.5771	0.727642	-0.922857	0.727642	TEX86H	Wade et al (2012)	﻿http://dx.doi.org/10.1130/G32577.1
SSQ	31.55	-88.03	27.726	-73.969	29.1761	1.07907	29.0113	0.568425	-0.164864	1.07907	TEX86H	Houben et al. (2019)	﻿http://dx.doi.org/10.1127/nos/2018/0455
SSQ	31.55	-88.03	27.726	-73.969	23.42	n/a	23.21	n/a	-0.21	n/a	d18O	Piga (2020); Wade et al (2012)	Piga, E. (2020) ﻿﻿How Hot is Hot? Tropical Ocean Temperatures and Plankton Communities in the Eocene Epoch, PhD thesis, Cardiff University
Tanzania	-9.198	39.548	-15.731	40.586	34.0039	n/a	33.2253	n/a	-0.7786	n/a	TEX86H	Cramwinckel et al. (2018), from Pearson et al (2007)	﻿https://doi.org/10.1038/s41586-018-0272-2	﻿http://dx.doi.org/10.1130/G23175A.1
Tanzania	-9.198	39.548	-15.731	40.586	29.7278	0.817317	28.7368	0.74923	-0.990936	0.817317	Mg/Ca	Lear et al. (2008) from Pearson et al. (2007)	https://doi.org/10.1130/G24584A.1	﻿http://dx.doi.org/10.1130/G23175A.1
Kysing-4	56	10.25	50.252	5.715	24.0048	2.71183	19.4496	0.787884	-4.55517	2.71183	TEX86H	Sliwinska et al. (2019)	﻿https://doi.org/10.1038/s41598-019-41013-7
959	3.37	-2.44	-4.61	-2.45	28.2053	0.654951	26.3633	0.628701	-1.84205	0.654951	TEX86H	Cramwinckel et al. (2018), Liu et al. (2009), Zhang et al.(2013)	﻿https://doi.org/10.1038/s41586-018-0272-2	http://dx.doi.org/﻿10.1126/science.1166368, http://dx.doi.org/10.1098/rsta.2013.0096
925	4.12	-43.29	-2.901	-32.242	29.6637	1.37351	29.4223	1.68927	-0.241394	1.68927	TEX86H	Cramwinckel et al. (2018), Zhang et al. (2013)	﻿https://doi.org/10.1038/s41586-018-0272-2	http://dx.doi.org/10.1098/rsta.2013.0096
U1404	40	-51.81	32.393	-39.168	27.1661	0.344587	25.62	0.747828	-1.54606	0.747828	UK37	Liu et al. (2018)	﻿https://doi.org/10.1038/s41561-018-0182-9
511	-51	-47	-58.113	-32.225	19.504	2.14188	11.2408	1.20755	-8.26318	2.14188	UK37	Liu et al. (2009)	http://dx.doi.org/﻿10.1126/science.1166368
511	-51	-47	-58.113	-32.225	17.8427	2.43894	13.2636	1.83645	-4.57904	2.43894	TEX86H	Inglis et al (2015), Liu et al (2009)	﻿http://dx.doi.org/10.1002/2014PA002723	http://dx.doi.org/﻿10.1126/science.1166368
277	-52	166	-54.952	-178.807	26.6439	0.956206	25.8665	0.968774	-0.777376	0.968774	TEX86H	Inglis et al (2015), Liu et al (2009)	﻿http://dx.doi.org/10.1002/2014PA002723	http://dx.doi.org/﻿10.1126/science.1166368
277	-52	166	-54.952	-178.807	24.8153	0.262336	23.6692	1.77409	-1.14609	1.77409	UK37	Liu et al. (2009)	http://dx.doi.org/﻿10.1126/science.1166368
925	4.12249	-43.2933	-2.899	-32.245	27.9496	0.241301	27.7727	0.262823	-0.176868	0.262823	UK37	Liu et al. (2009)	http://dx.doi.org/﻿10.1126/science.1166368
929	5.58568	-43.444	-1.445	-32.468	27.9559	0.302813	27.7018	0.342557	-0.254132	0.342557	UK37	Liu et al. (2009)	http://dx.doi.org/﻿10.1126/science.1166368
628	27.5	-78	22.457	-65.081	32.6645	0.581609	29.0558	3.91534	-3.60868	3.91534	TEX86H	Inglis et al (2015), Liu et al (2009)	﻿http://dx.doi.org/10.1002/2014PA002723	http://dx.doi.org/﻿10.1126/science.1166368
336	63.351	-7.7878	56.376	-10.932	20.0345	2.01176	16.4591	1.88157	-3.57542	2.01176	UK37	Liu et al. (2009)	http://dx.doi.org/﻿10.1126/science.1166368
913	75.4892	6.9468	67.47	6.027	18.2461	2.22118	13.6451	3.79411	-4.60096	3.79411	UK37	Liu et al. (2009)	http://dx.doi.org/﻿10.1126/science.1166368
1090	-45.5482	8.53982	-53.445	9.807	23.1109	1.77767	20.7562	2.20056	-2.35472	2.20056	UK37	Liu et al. (2009)	http://dx.doi.org/﻿10.1126/science.1166368
738, 744, 748	-60	80	-56.788	87.96	n/a	n/a	n/a	n/a	-2.6	0.8	Mg/Ca	Bohaty et al (2012)	﻿https://doi.org/10.1016/j.epsl.2011.11.037
