# Supplementary material for: The Eocene–Oligocene transition: a review of marine and terrestrial proxy data, models and model–data comparisons
Source: Copernicus journal article supplement (doi:10.5194/cp-17-269-2021), 2021-01-28
Supplement: Supplementary file 2 [file Table_S2_Terrestrial_temperatures.xlsx]

## Sheet: Sheet1
ID	Lat	Long	lat 34 Ma	lon 34 Ma	Site_name	Proxy	delta MAT	Delta_MAT error	Reference	Link
0	43.24	-103.59	41.391	-86.247	Toadstool	d18O	-8.2	3	Zanazzi et al (2007)	﻿http://dx.doi.org/10.1038/nature05551
1	51.02	-1.27	44.474	-3.415	Hampshire Basin	D47	-5	1	Hren et al (2013)	﻿https://doi.org/10.1073/pnas.1210930110
2	45.21	-112.64	44.646	-94.379	Dillon, Montana	Paleosols	-0.4	4	Sheldon (2009)	﻿https://doi.org/10.1130/2009.2452(15)
3	44.56	-120.16	45.135	-101.924	John Day, Oregon	Paleosols	-2	4	Sheldon (2009)	﻿https://doi.org/10.1130/2009.2452(15)
4	41.69	0.43	34.908	-0.431	Ebro Basin, Spain	Paleosols	-0.2	1.6	Sheldon (2009)	﻿https://doi.org/10.1130/2009.2452(15)
5	42.44	-103.59	40.607	-86.455	Harrison, Nebraska	Paleosols	-0.5	4	Sheldon (2009)	﻿https://doi.org/10.1130/2009.2452(15)
6	50.22	-1.27	43.678	-3.303	Isle of White	Paleosols	-0.3	4	Sheldon (2009)	﻿https://doi.org/10.1130/2009.2452(15)
7	44.01	-118.95	44.416	-100.893	East Oregon	Paleosols	-2.5	2	Gallagher and Sheldon (2013)	﻿http://dx.doi.org/10.1130/G34074.1
8	45.09	-113.12	44.6	-94.879	southwestern Montana	CLAMP	-2.2	2.4	Lielke et al (2012)	﻿http://bomax.botany.pl/pubs-new/#article-3604
9	-45.7	-68.73	-53.263	-58.204	Gran Barranca	d18O	-0.5	2.5	Kohn et al (2004)	﻿http://dx.doi.org/10.1130/G20442.1
10	-45.7	-68.73	-53.263	-58.204	Gran Barranca	dD	-2	1	Colwyn and Hren (2019)	https://doi.org/10.1016/j.epsl.2019.01.052
11	-41.09	-71.13	-48.625	-60.853	Ñirihuau	CLAMP	-1.2	2	Hinojosa et al (2005)	﻿https://doi.org/10.1016/j.palaeo.2004.11.013
12	21.86	110.85	28.242	110.421	Maoming	CLAMP	-0.87	2	Herman et al (2017)	﻿https://doi.org/10.1016/j.palaeo.2017.04.023
13	50	14	44.633	10.277	Bohemian	CLAMP	-3.8	2	Kvacek et al (2014)	﻿https://doi.org/10.3140/bull.geosci.1411
14	-63.3	136	-57.939	137.087	U1356	Alk. Geochem.	-3	3	Passchier et al (2013)	﻿https://doi.org/10.1002/ggge.20106
15	42.84	-103.19	40.942	-85.971	Toadstool	d18O	0	3	Boardman and Secord (2013)	﻿https://doi.org/10.1016/j.palaeo.2013.02.010
16	48.7	10.67	43.055	7.537	Oppertshofen	d18O	-4	2.5	Heran et al (2010)	﻿http://dx.doi.org/10.1016/j.palaeo.2009.11.030
17	36.5	102.5	41.459	98.561	Xining Basin	D47	-2.9	4	Page et al (2019)	﻿https://dx.doi.org/10.1130/G45480.1
18	42.65	-105.25	41.053	-87.986	East Wyoming	D47	-6.5	3	Fan et al (2017)	﻿https://dx.doi.org/10.1130/B31732.1
19	67.717	1.033	61.181	-5.064	643	NLR	-1	2	Eldrett et al (2009)	﻿http://dx.doi.org/10.1038/nature08069
