# Supplementary material for: The Eocene–Oligocene transition: a review of marine and terrestrial proxy data, models and model–data comparisons
Source: Copernicus journal article supplement (doi:10.5194/cp-17-269-2021), 2021-01-28
Supplement: Supplementary file 3 [file cp-17-269-2021-supplement.zip]

Archive with 5 entries (5 files):
- Table_S2_Terrestrial_temperatures.xlsx
- Table_S3_Combined_Delta_T.xlsx
- Table_S1_Marine_Temperatures.xlsx
- cp-17-269-2021-supplement-title-page.pdf
- Supplementary_Figures.pdf
