# Supplementary material for: The Eocene–Oligocene transition: a review of marine and terrestrial proxy data, models and model–data comparisons
Source: Copernicus journal article supplement (doi:10.5194/cp-17-269-2021), 2021-01-28
Supplement: Supplementary file 3 [file Table_S3_Combined_Delta_T.xlsx]

## Sheet: Proxies_reduced
Lat_paleo	Lon_paleo	Delta_T	Site
28.024	-74.608	-0.4775	Gulf Coast and SSQ
-15.731	40.586	-0.885	Tanzania
-58.113	-32.225	-6.42	511
-54.952	-178.807	-0.965	277
-2.415	-32.3183	-0.223333	925 and 929
-67.905	13.54	-1.43	689
50.252	5.715	-4.56	Kysing-4
-4.61	-2.45	-1.84	959
32.393	-39.168	-1.55	U1404
22.457	-65.081	-3.61	628
56.376	-10.932	-3.58	336
67.47	6.027	-4.6	913
-53.445	9.807	-2.35	1090
-56.788	87.96	-2.6	738, 744, 748
44.7755	-101.409	-3.5	John Day and East Oregon
44.623	-94.629	-1.35	Dillon, Montana and Southwestern Montana
44.076	-3.359	-2.7	Hampshire Basin and Isle of White
-53.263	-58.204	-1.25	Gran Barranca
40.9982	-86.6647	-3.65	Toadstool, Nebraska, and East Wyoming
34.908	-0.431	-0.2	Ebro Basin, Spain
-48.625	-60.853	-1.2	Ñirihuau
28.242	110.421	-0.87	Maoming
44.633	10.277	-3.7	Bohemian
-57.939	137.087	-3	U1356
43.055	7.537	-4	Oppertshofen
41.459	98.561	-2.9	Xining Basin
61.181	-5.064	-1	643
